# Supplementary material for: Trends in Androgen Deprivation Use in Men With Intermediate-Risk Prostate Cancer Who Underwent Radiation Therapy
Source: PubMed Central journal article supplement (PMC9260097; doi:10.1016/j.adro.2022.100904), 2022-02-04

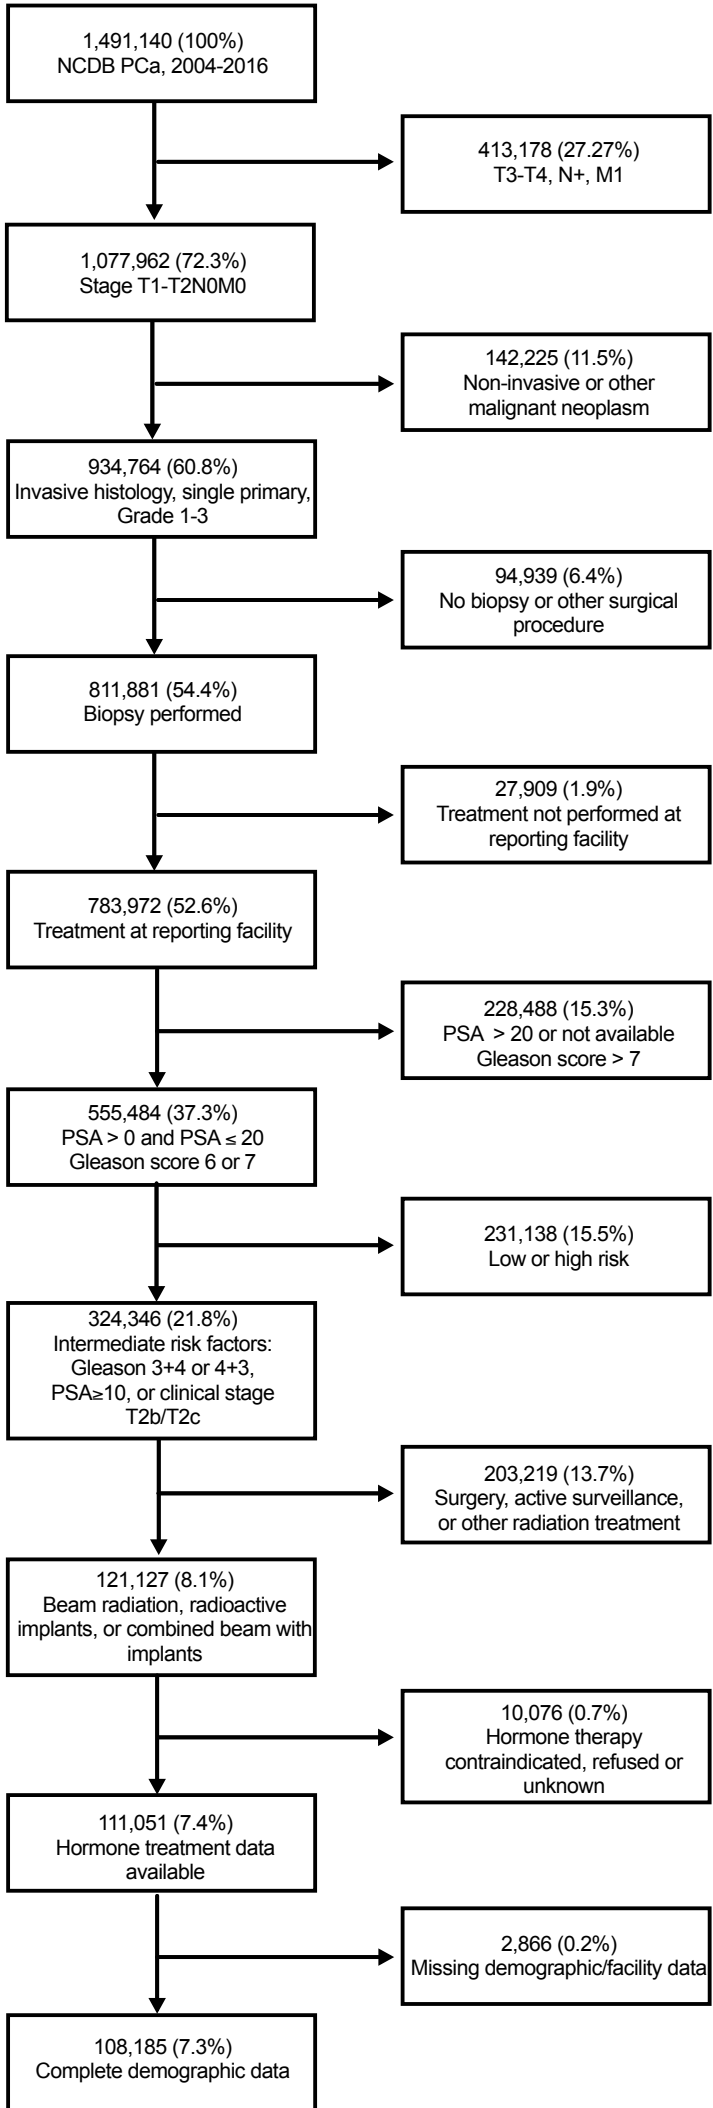

Supplement: mmc1.pdf [file mmc1.pdf]
